# Supplementary material
Source: Springer Nature journal article supplement (https://www.springermedizin.de/resource/supplementary/13002_2008_118_MOESM1_ESM.pdf/9627204)
Supplement: MOESM1 [file 9627204]

36° 26' 26" E

# SAMBURU DISTRICT

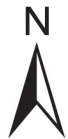

**KENYA**

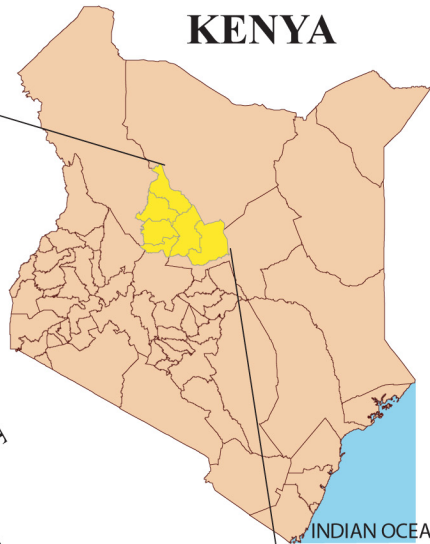

INDIAN OCEAN

TURKANA

MARSABIT

Nyiro

Baragoi

1° 33' 39" N

1° 33' 39" N

Kirisia

Wamba

BARINGO

Lorroki

Waso

ISILO

LAIKIPIA

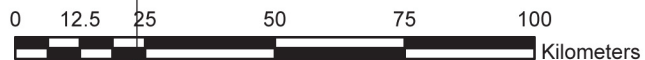

GCS: WGS 1984, UTM 37 S

36° 26' 26" E

Figure 1
